# Supplementary material
Source: PubMed Central journal article supplement (PMC4394871)
Supplement: Supp_Data.pdf [file Supp_Data.pdf]

## Supplementary Data

SUPPLEMENTARY TABLE S1. OLIGONUCLEOTIDE PRIMER SEQUENCES FOR QRT-PCR

| <i>Gene symbol</i>  | <i>Forward primer</i>   | <i>Reverse primer</i>    |
|---------------------|-------------------------|--------------------------|
| <i>Cdkn1a (p21)</i> | CTGGAGGGCAACTTCGTCT     | ACACCAGAGTGCAAGACAGC     |
| <i>Ink4a (p16)</i>  | CATCTGGAGCAGCATGGAGTC   | CGAATCTGCACCGTAGTTGAGC   |
| <i>Acan</i>         | GCATGAGAGAGGCGAATGGA    | CTGATCTCGTAGCGATCTTCTTCT |
| <i>Col2a1</i>       | TCCAGATGACTTTCCTCCGTCTA | AGGTAGGCGATGCTGTTCTTACA  |
| <i>Col1a1</i>       | TG TTCAGCTTTGTGGACCTC   | GGTTTCCACGTCTCACCATT     |
| <i>Col10a1</i>      | TTGACCCTGGTTCATGGGAT    | GGAATGCCTTGTTCTCCTCT     |
| <i>Gapdh</i>        | CCTCGTCCCGTAGACAAAATG   | TGAAGGGGTCGTTGATGGC      |
